# Supplementary material
Source: PubMed Central journal article supplement (PMC5364723)
Supplement: cm6b05143_si_001.pdf [file cm6b05143_si_001.pdf]

## Supporting Information

# Atomic Layer Deposition of Titanium Oxide on Single Layer Graphene: an Atomic Scale Study towards Understanding Nucleation and Growth

*Yucheng Zhang; Carlos Guerra-Nuñez; Ivo Utke; Johann Michler; Piyush Agrawal; Marta*

*D. Rossell; Rolf Erni*

To examine the possibility that the crystalline nuclei are strained  $\text{TiO}_2$ , EELS simulation of  $\text{Ti}_L$  edge was performed. Calculation of ELNES of  $\text{TiO}_2$  was carried out with real space multiple scattering code called FEFF8<sup>1,2</sup>. Self-consistent muffin tin potential and full multiple scattering was obtained using 6.0 Å radius. All calculations were performed using a core hole and an averaged contribution was calculated for  $\text{Ti}_L$  edge EELS spectra. CIF file with lattice parameters  $a$  and  $c$  of 4.6518 and 2.9699 Å, respectively was used for the calculations. EELS was also calculated on optimized strained structures where isotropic strain (2%, 5% and 10%) was applied to  $\text{TiO}_2$  bulk structure. The results are shown as following:

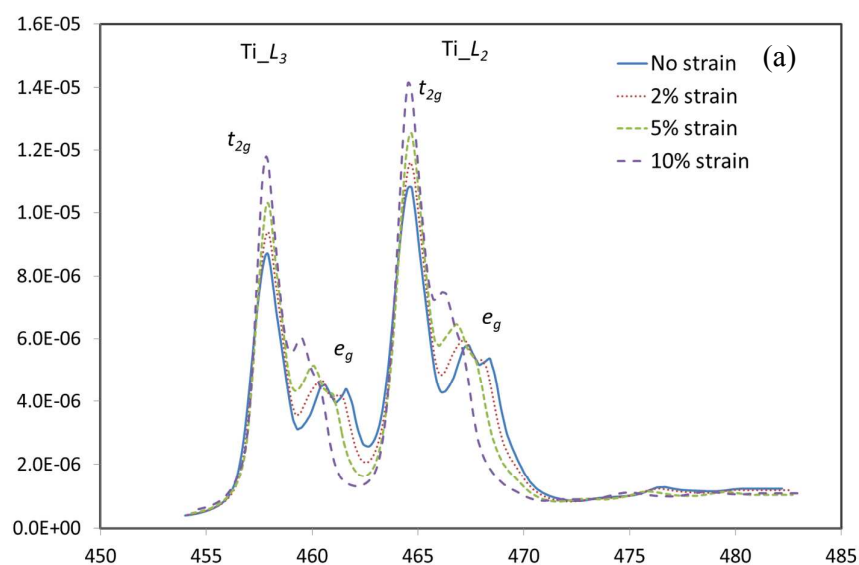

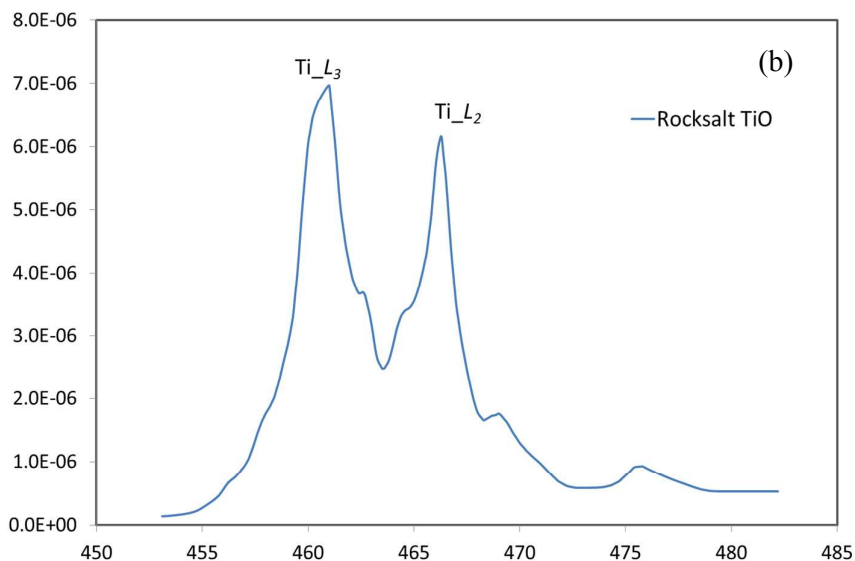

Figure S1: EELS simulation of  $Ti\_L$  edge for (a) anatase  $TiO_2$  under 0%, 2%, 5% and 10% isotropic strain respectively, and (b) rocksalt  $TiO$ .

It can be seen that the fine structure of  $Ti\_L$  edge for the strained anatase  $TiO_2$  maintains the same shape with the splitting peaks due to  $t_{2g}$  and  $e_g$  orbitals. The position of the  $e_g$  peak shifts toward a lower energy as the strain increases. For 10% strain, which corresponds to the lattice measurement in Figure 3, both  $t_{2g}$  and  $e_g$  peaks are still present with a much higher intensity for  $t_{2g}$ . This is not consistent with the experimental EELS spectrum for the nucleation sample in Figure 4, which indeed more resembles the simulation from a rocksalt  $TiO$  shown in (b). The peaking splitting of the  $Ti\_L$  edge is absent and only the intensity at the energy level of  $e_g$  exists. This can be well explained by the molecular orbital (MO) theory as presented in the main text. Therefore, the EELS simulation can rule out possibility that the crystalline nuclei are strained  $TiO_2$  and support the presence of rocksalt  $TiO$  at the early stage of nucleation.
